# Supplementary material for: Insights into Regulation of C2 and C4 Photosynthesis in Amaranthaceae/Chenopodiaceae Using RNA-Seq
Source: MDPI journal article supplement (doi:10.3390/ijms222212120), 2021-11-09
Supplement: s1 [file s1]

**Table S2.** Voucher information of species used in this study.

| Lineage        | Species                                                                                 | PS type          | Herbarium/voucher ID                                                                                                                                                                      |
|----------------|-----------------------------------------------------------------------------------------|------------------|-------------------------------------------------------------------------------------------------------------------------------------------------------------------------------------------|
| Cam-phorosmeae | <i>Threlkeldia diffusa</i> R. Br.                                                       | C <sub>3</sub>   | Millenium Seed Bank serial number: 0381990; cultivated at Botanical Garden Mainz, living coll. no 076 (voucher MJG 027679)                                                                |
|                | <i>Sedobassia sedoides</i> (Pall.) Freitag & G.Kadereit                                 | C <sub>2</sub>   | G. Somogyi s.n., Hungary, Besenyötelek, Csuportos-legelő, N 47,688119°, E 20,461372°, 2012 (cultivated at Botanical Garden Mainz, living coll. no 002; voucher at MJG)                    |
|                | <i>Bassia prostrata</i> (L.) Beck                                                       | C <sub>4</sub>   | G. Somogyi s.n., Hungary, Besenyötelek, Csuportos-legelő, N 47,685817°, E 20,465919°, 2012 (cultivated at Botanical Garden Mainz, living coll. no 001; voucher at MJG)                    |
| Salsoleae      | <i>Salsola webbii</i> Moq.                                                              | C <sub>3</sub>   | Elena Voznesenskaya s.n., Southern Spain, collected in 2011; (cultivated at Pullman Univ., Washington and Botanical Garden Mainz; living coll. number 67; voucher at MJG)                 |
|                | <i>Salsola divaricata</i> Masson ex Link<br>Pop-184                                     | C <sub>2</sub>   | Gil González, J. s.n., 2013-10-21, Spain, Canary Islands, Lanzarote, Haria, Punta Mujeres (MJG 014225)                                                                                    |
|                | <i>Salsola divaricata</i> Masson ex Link<br>Pop-198                                     | C <sub>2</sub>   | Anonymous collector, Spain, Gran Canaria, Cuesta Ramón, Jinamar, Zona 28R, UTM: E 458720,932 N 3102402,105 (cultivated at Botanical Garden Mainz, living collection no 198II; MJG 013542) |
|                | <i>Salsola soda</i> L.                                                                  | C <sub>4</sub> * | Kaligarič, M. s.n. 2009-09-14, Slovenia, Sv. Katarina (Ankaran) near Koper (cultivated at Botanical Garden Mainz living collection no. 125; MJG 013542)                                   |
|                | <i>Hammada scoparia</i> (Pomel) Iljin<br>synonym of<br><i>Haloxylon scoparium</i> Pomel | C <sub>4</sub>   | Millenium Seed Bank serial number 0089920, cultivated at Botanical Garden Mainz, living coll. no 087 and 089.                                                                             |
|                | <i>Salsola oppositifolia</i> Desf.                                                      | C <sub>4</sub>   | H. Freitag 40002; SW Morocco 18 km N Agadir, near Tamrhakt, behind coastal cliff, most common along roadside (cultivated at Botanical Garden Mainz, living coll. number 173; MJG 013564)  |
